# Supplementary material
Source: PubMed Central journal article supplement (PMC4955399)
Supplement: NIHMS802658-supplement-Supplemental.pdf [file NIHMS802658-supplement-Supplemental.pdf]

## Supplementary Information

# Post-translational Claisen Condensation and Decarboxylation en Route to the Bicyclic Core of Pantocin A.

Swapnil V. Ghodge<sup>1</sup>, Kristen A. Biernat<sup>2</sup>, Sarah Jane Bassett<sup>1</sup>, Matthew R. Redinbo<sup>2</sup>, and Albert A. Bowers<sup>1</sup>

<sup>1</sup>Division of Chemical Biology and Medicinal Chemistry, Eshelman School of Pharmacy, University of North Carolina at Chapel Hill, Chapel Hill, NC, USA

<sup>2</sup>Department of Chemistry, University of North Carolina at Chapel Hill, Chapel Hill, NC, USA

## Table of contents

### Materials and methods

|                                                                         |    |
|-------------------------------------------------------------------------|----|
| Cloning PaaA.....                                                       | S3 |
| Expression and Purification of PaaA.....                                | S3 |
| Crystal Structure Determination of PaaA.....                            | S4 |
| Site-directed Mutagenesis .....                                         | S4 |
| Solid-phase Peptide Synthesis of PaaP and Truncates.....                | S4 |
| Enzymatic Assays of PaaA using LC-MS.....                               | S5 |
| Limited Proteolysis of PaaA.....                                        | S5 |
| Bioinformatic Analysis of PaaA and Related Enzymes .....                | S6 |
| NMR analysis of the product of PaaA-catalyzed modification of PaaP..... | S6 |
| <br>                                                                    |    |
| <b>Scheme S1</b> .....                                                  | S8 |

### Figures and tables

|                                                                                                                                                                                                       |     |
|-------------------------------------------------------------------------------------------------------------------------------------------------------------------------------------------------------|-----|
| <b>Table S1.</b> Crystallographic statistics for the selenomethionine PaaA structure .....                                                                                                            | S9  |
| <b>Table S2.</b> Disordered regions not displayed in the Se-Met PaaA structure.....                                                                                                                   | S9  |
| <b>Table S3.</b> Average B-factors of the N-terminal and C-terminal domains in the Se-Met PaaA structure .....                                                                                        | S10 |
| <b>Figure S1.</b> LC-MS/MS analysis of the product of PaaA-catalyzed transformation of PaaP .....                                                                                                     | S11 |
| <b>Figure S2.</b> NMR analysis of the purified product of PaaA-catalyzed transformation of PaaP .....                                                                                                 | S12 |
| <b>Figure S3.</b> Extracted ion chromatograms for PaaA enzymatic modification of synthetic PaaP .....                                                                                                 | S13 |
| <b>Figure S4.</b> LC-MS/MS analysis of the product of PaaA-catalyzed transformation of M1-Q25 PaaP.....                                                                                               | S14 |
| <b>Figure S5.</b> Relative enzymatic activity of PaaA active-site variants with point mutations of select residues predicted to bind ATP .....                                                        | S15 |
| <b>Figure S6.</b> Representative electron density of Se-Met PaaA contoured at $1.5\sigma$ level.....                                                                                                  | S16 |
| <b>Figure S7.</b> B-factor presentation of the Se-Met PaaA structure .....                                                                                                                            | S17 |
| <b>Figure S8.</b> Limited proteolysis of PaaA in the presence and absence of substrate .....                                                                                                          | S18 |
| <b>Figure S9.</b> Structural alignment of Se-Met PaaA with its closest homologs .....                                                                                                                 | S19 |
| <b>Figure S10.</b> LC-MS/MS analysis of synthesized peptides, along with the respective UV traces ( $\lambda = 220$ nm) .....                                                                         | S20 |
| <b>Figure S11.</b> Sequence similarity network of enzyme sequences closely related to PaaA.....                                                                                                       | S21 |
| <b>Table S4.</b> List of identifiers of enzyme sequences that are predicted, from this study, to possess an N-terminal RRE domain fused to an E1-domain, similar to those found in MccB and PaaA..... | S22 |
| <b>Figure S12.</b> Bimodal distribution of the lengths of proteins related to PaaA and MccB .....                                                                                                     | S29 |

## Materials and methods

Protected amino acids were purchased from Chempep Inc., buffers and solvents were purchased from Fischer Scientific, and the remaining chemicals and reagents were purchased from Sigma-Aldrich, unless mentioned otherwise. Preparatory HPLC was performed in a Shimadzu UFLC CBM-20A with a dual channel wavelength detector at 220 nm and 260 nm with a LUNA 10  $\mu$  C18(2) 100 A, AXIA (Phenomenex®) semi-preparatory column with a 15 mL/min flow rate. Purification was carried out with a two solvent system (solvent A = 0.1% trifluoroacetic acid in water; solvent B = 0.1% trifluoroacetic acid in acetonitrile) using gradient flow. LC-MS analysis was done using Kinetex 2.6 $\mu$  C18 column, and mass spectrometry measurements were recorded using an Agilent 6520 Accurate-Mass Q-TOF ESI positive in high-resolution mode. Predicted masses were extracted to  $\pm 5$  ppm.

**Cloning PaaA.** PaaA gene was amplified from the cosmid template pCPP702 using Phusion® High-fidelity mastermix with HF buffer (NEB) following manufacturer's instructions. The primer sequences used for PCR reactions were as follows:  
Forward: 5'-GATCGATCCCATGGGCATGTCACTAACGAATGTAAACC-3'  
Reverse: 5'-CTCGAGGATCGATCTTTAAAAATCTCT-3'

The PCR product was digested using NcoI and XhoI restriction enzymes (NEB) according to standard procedures. The vector pET28b was digested with the same two restriction enzymes as above, followed by treatment with Antarctic Phosphatase. The digested vector and insert were incubated together along with T4-DNA ligase in 1x-T4 ligase buffer, and the reaction was transformed into One-Shot® Top10 *E.coli* competent cells (Agilent). A single colony was picked and transferred to LB medium containing 50  $\mu$ g/mL kanamycin and incubated overnight at 37 °C. The PaaA-pET28b cloned plasmid was purified using Purelink™ plasmid purification kit (Invitrogen) and stored at -20 °C.

**Expression and Purification of PaaA.** PaaA was expressed in BL21-Gold (DE3) *E. coli* cells (Invitrogen) in LB medium containing 40  $\mu$ g/mL kanamycin. Cells were grown at 37°C until an OD<sub>600</sub> of 0.5 was attained, at which point the temperature was lowered to 18°C. At an OD<sub>600</sub> of 0.8, protein expression was induced with the addition of 0.1 mM isopropyl-1-thio-D-galactopyranoside (IPTG) and incubated overnight at 18°C. Cells were collected by centrifugation at 4500xg for 20 min at 4°C in a Sorvall (model RC-3B) swinging bucket centrifuge. Cell pellets were resuspended in Buffer A (20 mM Tris, pH 7.5, 30 mM imidazole, 300 mM NaCl, 5% Glycerol, 1 mM DTT) and a Roche complete-EDTA free protease inhibitor tablet per 50 mL buffer. Resuspended cells were sonicated and centrifuged at 14,500xg for 60 min in a Sorvall (model RC-5B) centrifuge to clarify the lysate. The lysate was passed through a Ni-NTA HP column (GE Healthcare), loaded

onto the Äktaxpress FPLC system (Amersham Biosciences) and washed with Buffer A. Protein was eluted with Buffer B (20 mM Tris, pH 7.5, 500 mM imidazole, 300 mM NaCl, 5% glycerol, 1 mM DTT). Purity of eluted fractions was assessed by SDS-PAGE. Purest fractions were combined and passed over a HiLoad™ 16/60 Superdex™ 200 gel filtration column. The protein was eluted into 50 mM HEPES, pH 7.5, 150 mM NaCl, 5% glycerol, and 1 mM DTT. Fractions (1.5 mL each) were collected based on highest ultraviolet absorbance at 280 nm. Fractions were analyzed by SDS-PAGE (which indicated >95% purity), combined, and concentrated using a Millipore centrifugal filter at 3000xg to 15 mg/mL.

To express selenomethionine-substituted PaaA, SelenoMet™ Medium and Nutrient Mix (AthenaES) was prepared for growth, with 60 mg of selenomethionine added for each liter of medium. Cells were grown at 37°C until an OD<sub>600</sub> of 0.7 was attained and then induced with 0.3 mM IPTG. The cultures were then grown overnight at 18°C. Purification was performed as for the wild-type enzyme (see above).

**Crystal Structure Determination of PaaA.** Crystals of selenomethionine PaaA were grown at room temperature using the hanging-drop diffusion method by mixing the protein (15 mg/mL) with reservoir solution containing 12% PEG4000, 0.15 M MgSO<sub>4</sub>, and 10% glycerol. Crystals were briefly soaked in a solution containing 12% PEG4000, 0.15 M MgSO<sub>4</sub>, and 20% glycerol before plunging into liquid nitrogen in preparation for x-ray data collection. Diffraction data were collected on the 23-IDD beam line at GM/CA-XSD (Advanced Photon Source, Argonne National Laboratory). The selenomethionine crystals exhibited at P2<sub>1</sub>2<sub>1</sub>2 space group, and the asymmetric unit contained two monomers. The PHENIX software suite (AutoSol) was utilized to locate heavy atom sites, and the model was built by hand in Coot using the SAD data. Monomers A and B both exhibited clearly interpretable electron density within the C-terminal domains; by contrast, the N-terminal domains were less ordered, which is expected in this apo structure without PaaP bound. Data collection and refinement statistics are presented in **Table S1**.

**Site-directed Mutagenesis.** PaaA mutants were created using PCR mutagenesis in which K134, R174, or K187 was replaced with alanine. Primers were synthesized by Integrated DNA Technologies. Primer sequences are as follows:

**R174A.** Forward: 5'-CGAGTTGTCAAACATCAAC**GCA**CAGGTGTTGTATCGCACA -3'

Reverse: 5'-TGTGCGATAACAACCTGT**GCG**TTGATGTTTGACAACTCG-3'

**K187A.** Forward: 5'-CAGATGATGTAGGCAAGAAC**GCA**GTTGATGCGGCCAAAGATA-3'

Reverse: 5'-TATCTTTGGCCGCATCAACT**GCG**TTCTTGCCTACATCATCTG-3'

**R134A.** Forward: 5'-GTATCAGGAACGGCTAAAGCAAAGT**GCG**GTAGCCATCTTC-3'

Reverse: 5'-GAAGATGGCTACCGCACTTTGCTTTAGCCGTTCTGATAC-3'

Plasmids from isolated colonies were sequenced by Eton Biosciences Inc. to confirm the correct mutations were introduced into the gene. Expression and purification was performed as for the wild-type enzyme (see above).

**Solid-phase Peptide Synthesis of PaaP and Truncates.** Peptide synthesis was carried out using solid-phase peptide synthesis on a Biotage Initiator+ Alstra microwave peptide synthesizer using either the Rinkamide resin from Chempep Inc. or Rinkamide Chemmatrix resin from Biotage. The peptides were synthesized from the C to the N-terminus with a C-terminus amide functional group using standard fluorenylmethoxycarbonyl (Fmoc) chemistry. This process employed N- $\alpha$ -Fmoc-L-amino acids, with the coupling agents HATU and HOAt as 0.4 M solutions in DMF, and 5 min microwave irradiation was used for the addition of each amino acid at 75 °C. Fmoc deprotection was achieved using 20% (v/v) piperidine/DMF for 3 min and 10 min, with DMF wash at the end of each deprotection step. After the final deprotection to obtain a primary amine at the N-terminus of the synthesized peptide, the resin was washed with dichloromethane and dried. The final peptide product was cleaved using a cleavage cocktail containing 94 or 95% (v/v) TFA, 2.5% (v/v) water, 2.5% (v/v) triisopropylsilane (TIPS), and 1 or 0% (v/v) ethanedithiol (EDT). EDT was added when the peptide sequence contained at least one methionine. Cleavage reactions were carried out at room temperature for about 3 hours in syringes fitted with frits. The cleaved peptide was precipitated by the dropwise addition of the cleavage reaction mixture into cold diethyl ether. The diethyl ether was evaporated using a speedvac; the dried solid was dissolved in DMSO, and diluted with a mixture of 50% v/v acetonitrile-water. This crude product was then purified using preparatory HPLC, and the fractions were analyzed using the UV trace at 220 nm and LC-MS. In general, the synthesized peptides eluted in a range between 33%-41% buffer B. Fractions containing the relatively pure product were dried using Rotavap rotary evaporator, redissolved in methanol, and transferred to clean eppendorf tubes. The product was then dried in the speedvac, weighed and stored at -20 °C.

**Enzymatic Assays of PaaA using LC-MS.** In general, 25  $\mu$ M PaaP was incubated with 2.5  $\mu$ M PaaA for ~16 hours in the presence of 50 mM HEPES pH 7.5, 4 mM MgCl<sub>2</sub>, 1 mM ATP, and 0.5 mM TCEP, alongside a control containing no PaaA. These solutions were analyzed using LC-MS. Assays for comparing the activity of PaaA variants were carried out by incubating 25  $\mu$ M PaaP with 1  $\mu$ M PaaA for ~6 hours in the presence of 50 mM HEPES pH 7.5, 4 mM MgCl<sub>2</sub>, and 0.5 mM ATP.

**Limited Proteolysis of PaaA.** Protease digestion reactions (40  $\mu$ L) were carried

out at room temperature using a final PaaA concentration of 0.6 mg/mL in Buffer C (20 mM Tris, pH 7.5, 150 mM NaCl). For reactions containing the peptide ligand, M1-S30 or M1-Q25 was added in 5:1 molar ratio to PaaA. Stocks of trypsin and chymotrypsin (1 mg/mL) were prepared in 0.1 mM HCl and added to a final concentration of 1.4 µg/mL to initiate the reactions. The reactions were quenched by the addition of phenylmethylsulfonyl fluoride (PMSF, 100 mM) and Laemmli loading dye at 0, 1, 5, 15, 30, 60, and 120 minutes. Samples from each time point were assessed by SDS-PAGE (**Figure S8**).

**Bioinformatic Analysis of PaaA and Related Enzymes.** The sequence similarity network diagram of enzyme sequences closely related to PaaA was generated using the EFI-EST (Enzyme function initiative- enzyme similarity tool) online tool. PaaA sequence was used as a query for BLAST search by the EFI-EST server, which generated a network diagram containing ~4500 redundant enzyme sequences similar to PaaA ranging between 230-420 amino acids in length. A smaller, and more manageable network diagram containing 635 sequences was chosen for study in which each node represented sequences bearing ≥60% sequence identity to each other. A BLAST E-value of  $1 \times 10^{-45}$  was arbitrarily chosen for representation. Representative sequences from each cluster of nodes were used as a query in the HHPred online database to verify whether they possessed the N-terminal RRE or leader-peptide recognition domain. A list of the enzyme sequence identifiers that were determined to possess an RRE domain fused to an E-1 domain are provided in **Table S4**, in conjunction with **Figure S10**.

**NMR analysis of the product of PaaA-catalyzed modification of PaaP.** A 32 mL reaction containing 25 µM PaaP, 2 µM PaaA, 4 mM MgCl<sub>2</sub>, and 0.5 mM ATP in 50 mM HEPES buffer, pH 7.5, was incubated at room temperature for ~16 hours. The solution was subjected to LC-MS analysis to confirm formation of the product. The reaction mixture was split and transferred into three 20-mL scintillation vials and was lyophilized. The solid obtained was treated with ~0.8 mL DMSO to redissolve the peptide product. The DMSO solution was centrifuged to separate the undissolved solids and the supernatant was further diluted to ~3 mL using 1:4 mixture of acetonitrile-water. The peptide product was purified using preparatory-scale HPLC, using a procedure similar to the purification of peptides after solid phase synthesis. Eluent was monitored based on the absorbance at 220 nm, and the eluted fraction (~38% buffer B) displaying significant absorbance was selected. Presence of product was confirmed by LC-MS. The fraction was partially concentrated in a rotary evaporator, followed by flash freezing and lyophilization to obtain the purified solid product of PaaA reaction (~1.5 mg solid). This solid was redissolved in 180 µL DMSO-d<sub>6</sub> for NMR analysis. NMR data was acquired

using Bruker Avance III-HD NMR spectrometers with a magnetic field of 850 MHz (for one-dimensional  $^1\text{H}$ -NMR spectroscopy) or 700 MHz (for  $^{13}\text{C}$ -HSQC spectroscopy) respectively.

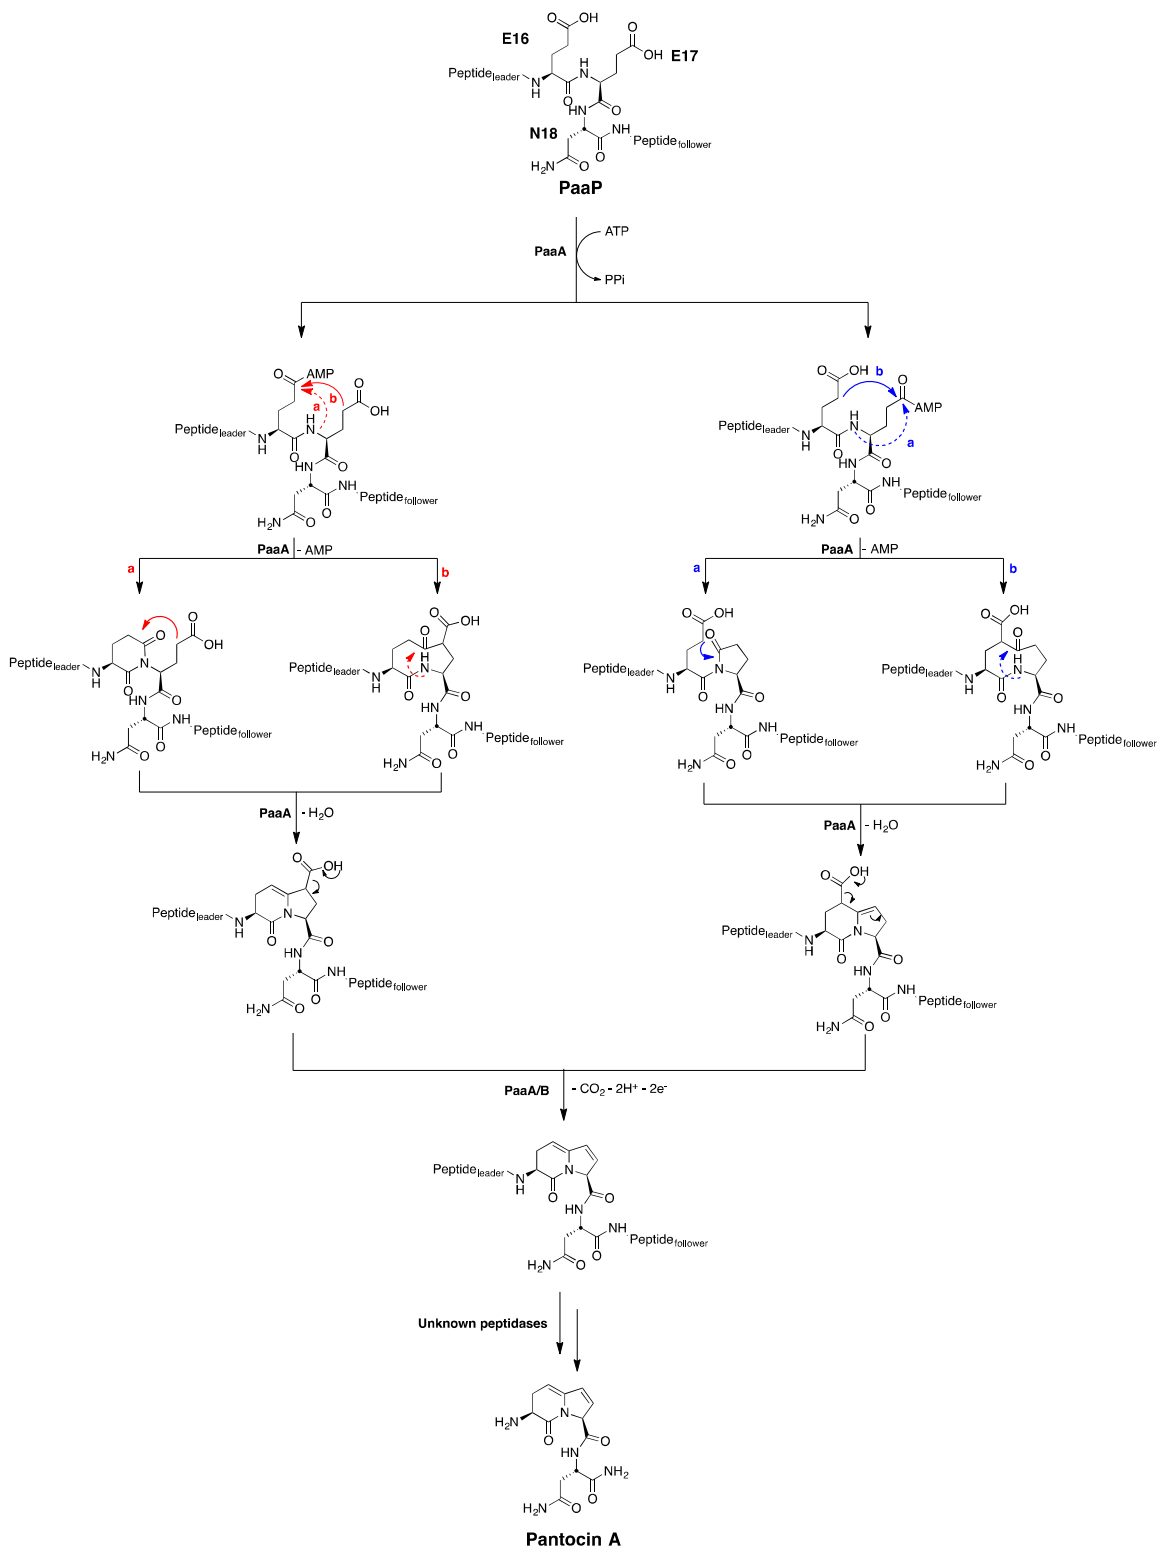

**Scheme S1.**



**Table S1. Crystallographic statistics for the selenomethionine PaaA structure**

|                                  |                                  |
|----------------------------------|----------------------------------|
| Resolution (highest shell), Å    | 29.4-2.93 (3.11-2.93)            |
| Space group                      | P2 <sub>1</sub> 2 <sub>1</sub> 2 |
| Unit cell, Å                     | 68.9, 170.4, 64.3                |
| Total reflections                | 427,046                          |
| Unique reflections               | 16,878                           |
| Multiplicity                     | 25.3 (25.1)                      |
| Completeness, %                  | 99.7 (99.4)                      |
| Mean I/sigma (I)                 | 24.9 (6.9)                       |
| Wilson B-factor, Å <sup>2</sup>  | 78.7                             |
| R <sub>sym</sub>                 | 0.11 (0.60)                      |
| R                                | 0.210                            |
| R <sub>free</sub>                | 0.289                            |
| No. of atoms                     | 4,760                            |
| rms bonds, Å                     | 0.009                            |
| rms angles, °                    | 1.30                             |
| Ramachandran favored, %          | 93.4                             |
| Ramachandran outliers, %         | 0.99                             |
| Clash score                      | 19.2                             |
| Average B-factor, Å <sup>2</sup> | 66.3                             |

**Table S2. Disordered regions (residue numbers) not displayed in the Se-Met PaaA structure.**

| Chain A | Chain B |
|---------|---------|
| 1-10    | 1-5     |
| 53-57   | 17-55   |
| 66-68   | 67-72   |
| 233-241 | 233-241 |
| 287-310 | 289-298 |
| 375-381 | 373-381 |

**Table S3. Average B-factors of the N-terminal and C-terminal domains in the Se-Met PaaA structure.**

| <b>Domain*</b>           | <b>Average B-factor**</b> |
|--------------------------|---------------------------|
| Chain A, residues 1-98   | 64.7                      |
| Chain A, residues 99-381 | 53.9                      |
| Chain B, residues 1-98   | 68.3                      |
| Chain B, residues 99-381 | 56.5                      |

\* Residues 1-98 constitute the RRE domain while 99-381 constitute the adenylation domain.

\*\*Residues that were disordered within each domain did not contribute to the average B-factor.

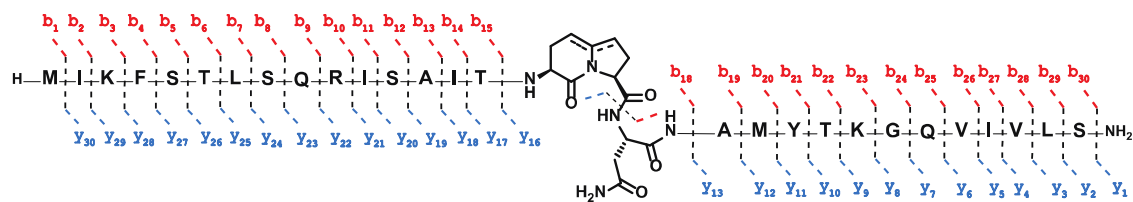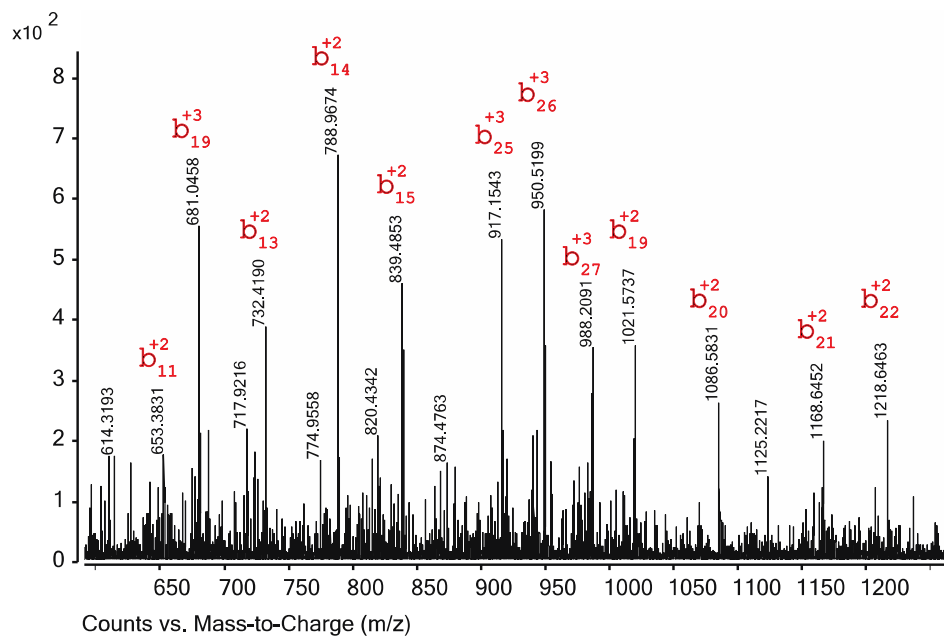

**Figure S1. LC-MS/MS analysis of the product of PaaA-catalyzed transformation of PaaP.**  $[M + 4H^+]^{+4} = 820.2010$  ion was selected for fragmentation using a collision energy of 30 eV. The b-ions are shown in red while the y-ions are indicated in blue.

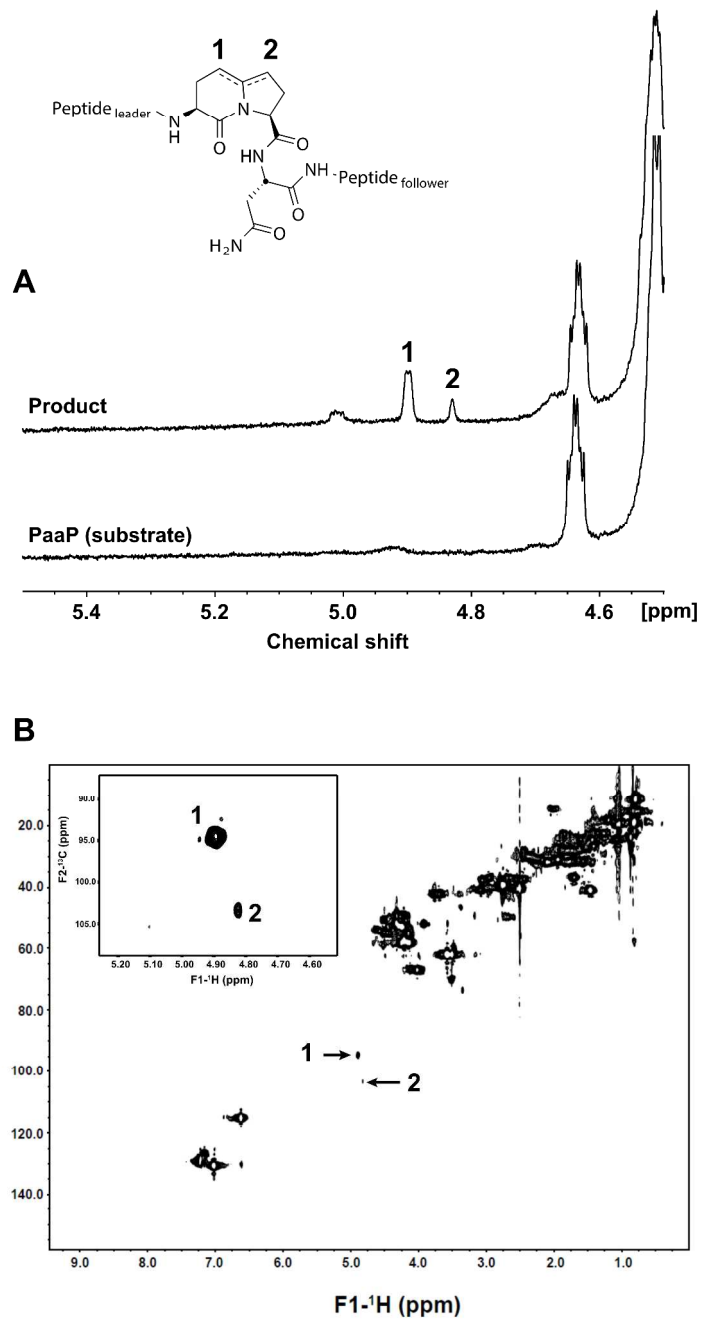

**Figure S2. NMR analysis of the purified product of PaaA-catalyzed transformation of PaaP. A)** One-dimensional  $^1\text{H-NMR}$  spectrum of the product and substrate of PaaA. **B)**  $^{13}\text{C-HSQC}$  spectrum of the product of PaaA-catalyzed reaction. The new resonance signals are shown in the inset.

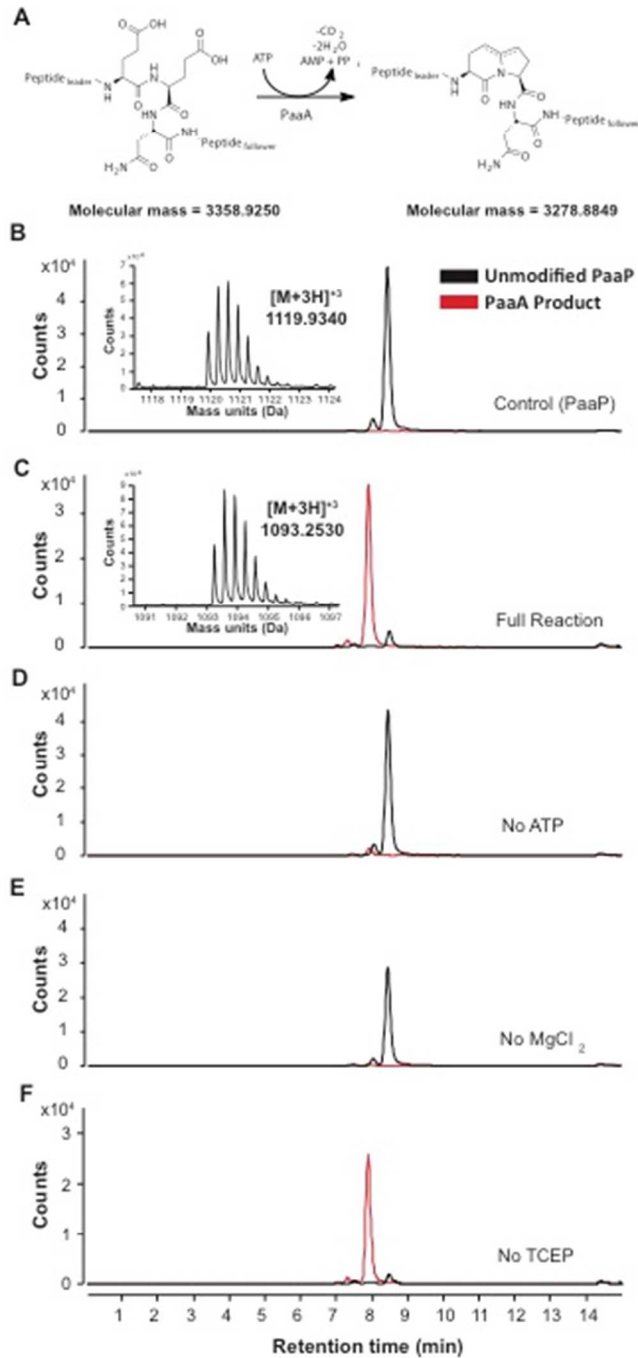

**Figure S3. Extracted ion chromatograms for PaaA enzymatic modification of synthetic PaaP.** **A.** Reaction scheme. **B.** Control PaaP (25  $\mu$ M) without enzyme. **C.** PaaP (25  $\mu$ M) after incubation with PaaA (2.5  $\mu$ M), 4 mM MgCl<sub>2</sub>, 1 mM ATP and 0.5 mM TCEP for 15 hours. **D, E,** and **F** are reactions without ATP, MgCl<sub>2</sub>, or TCEP respectively.

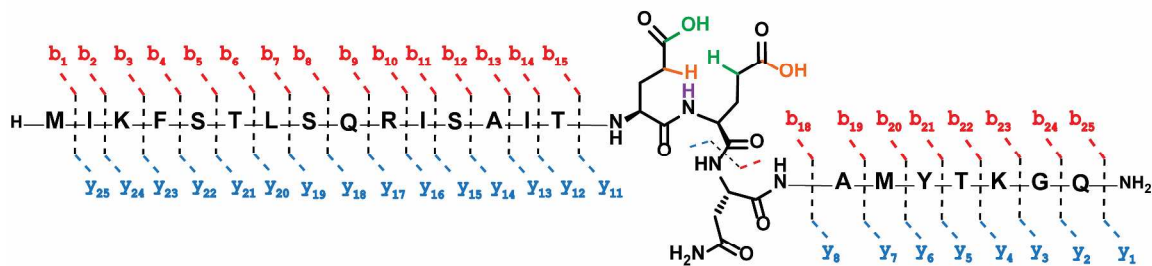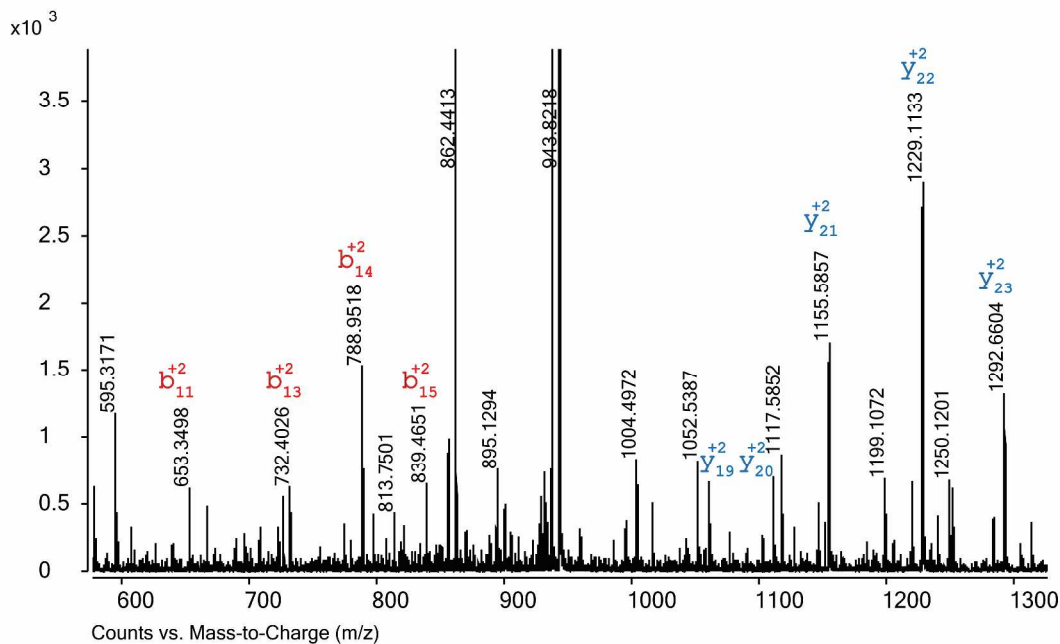

**Figure S4. LC-MS/MS analysis of the product of PaaA-catalyzed transformation of M1-Q25 PaaP.**  $[M + 3H^+]^{+3} = 943.5000$  ion was selected for fragmentation using a collision energy of 35 eV. The b-ions are shown in red while the y-ions are indicated in blue. Due to a lack of knowledge of the mechanistic details of the PaaA-catalyzed enzymatic reaction, it is presently unclear as to which water molecule is eliminated. The two possibilities of a Claisen-type condensation between the two glutamate side-chains to give a 9-membered ring structure is shown using orange and green colors, while the possibility that the backbone nitrogen atom acting as a nucleophile resulting in either a 5- or 6-membered ring structure depending on which of the two glutamate side-chains is activated using ATP, is indicated by the purple H-atom.

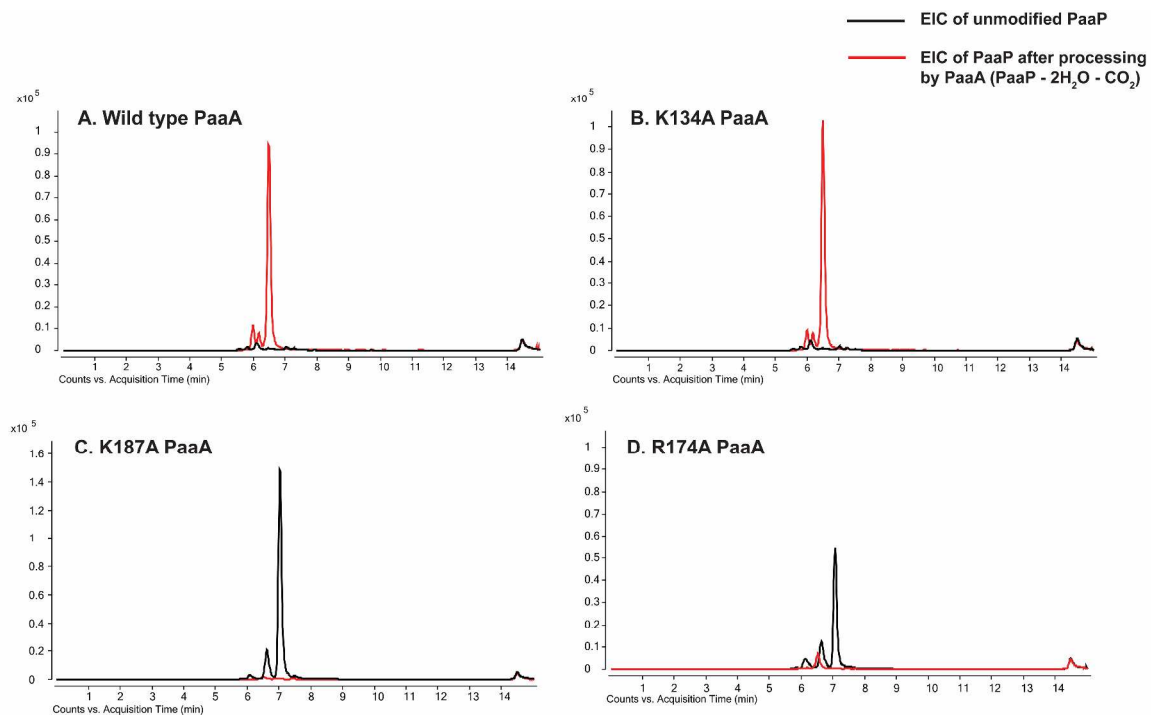

**Figure S5. Relative enzymatic activity of PaaA active site variants with point mutations of select residues predicted to bind ATP.** 25  $\mu\text{M}$  PaaP was incubated with 1  $\mu\text{M}$  enzyme in each case, in the presence of 50 mM HEPES pH 7.5, 0.5 mM ATP, and 4 mM  $\text{MgCl}_2$ . The reaction was allowed to proceed for  $\sim 6$  hours, and then analyzed by LC-MS. K134 is a residue away from the active site, and was chosen as a control point mutation.

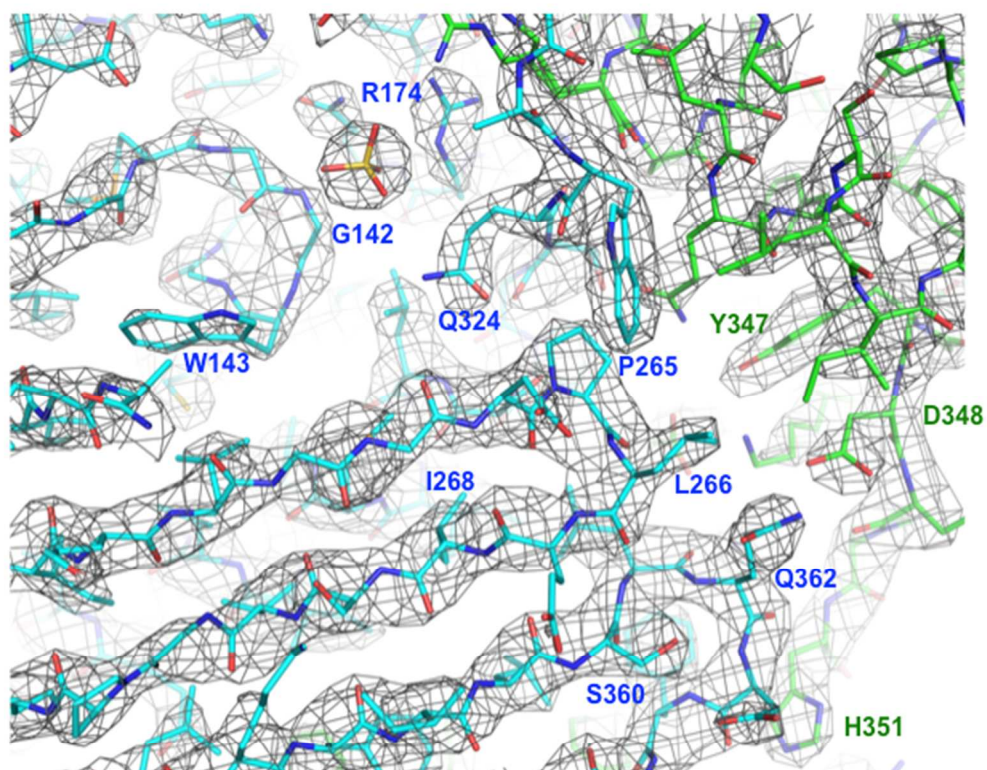

**Figure S6. Representative 2Fo-Fc electron density of Se-Met PaaA contoured at 1.5 $\sigma$  level.** The two protomers are shown in stick representation in green (chain A) and cyan (chain B).



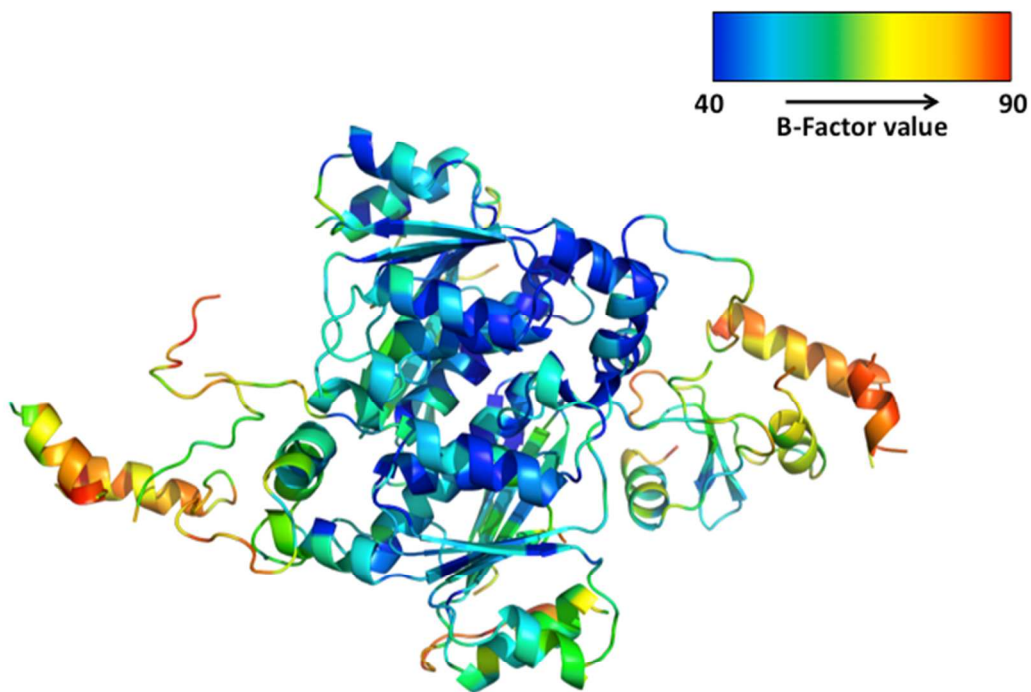

**Figure S7. B-factor presentation of the Se-Met PaaA structure.** The warmer the color, the higher the B-factor of the alpha carbon.

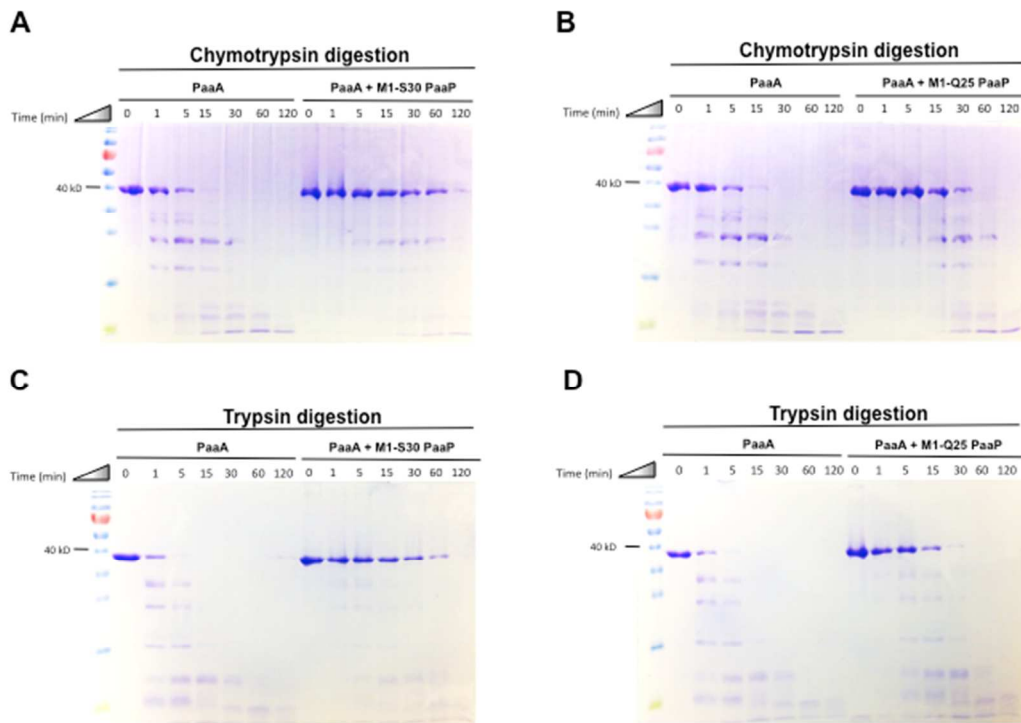

**Figure S8. Limited proteolysis of PaaA in the presence and absence of substrates M1-S30 (full length) PaaP, and M1-Q25 PaaP.** Results indicate that the peptide substrates protect PaaA from proteolysis by the two proteases. Experimental details are provided in the materials and methods section.

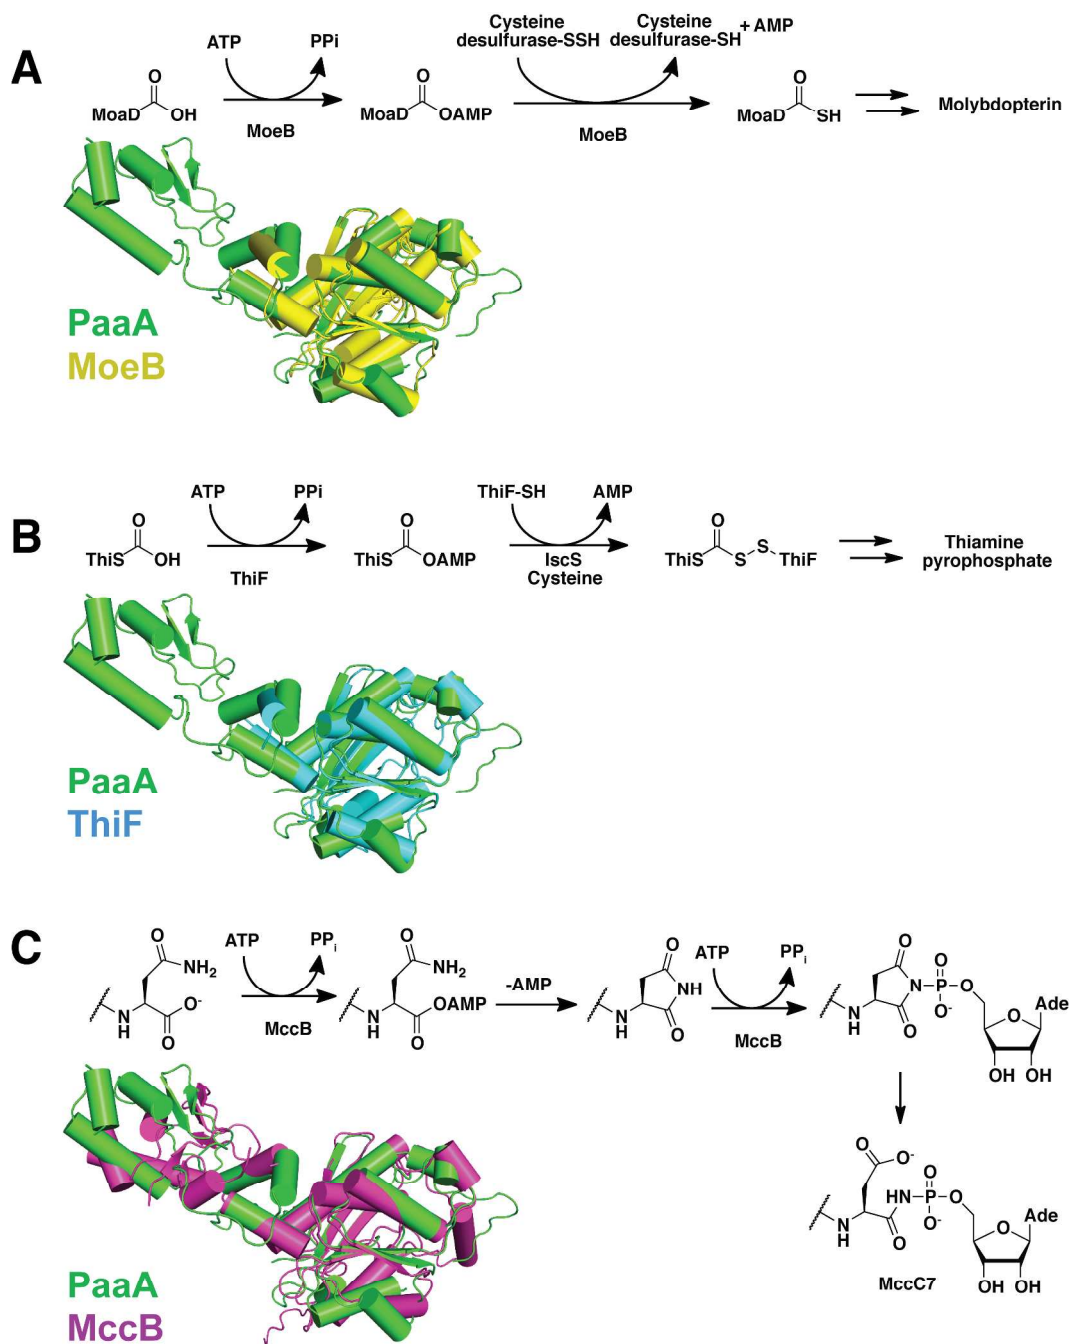

**Figure S9. Structural alignment of Se-Met PaaA (chain A, green) with its closest homologs; (A) MoeB (PDB: 1JW9, yellow), (B) ThiF (PDB: 1ZKM, cyan), and (C) MccB (PDB: 3H5A, magenta). The respective reactions are shown.**

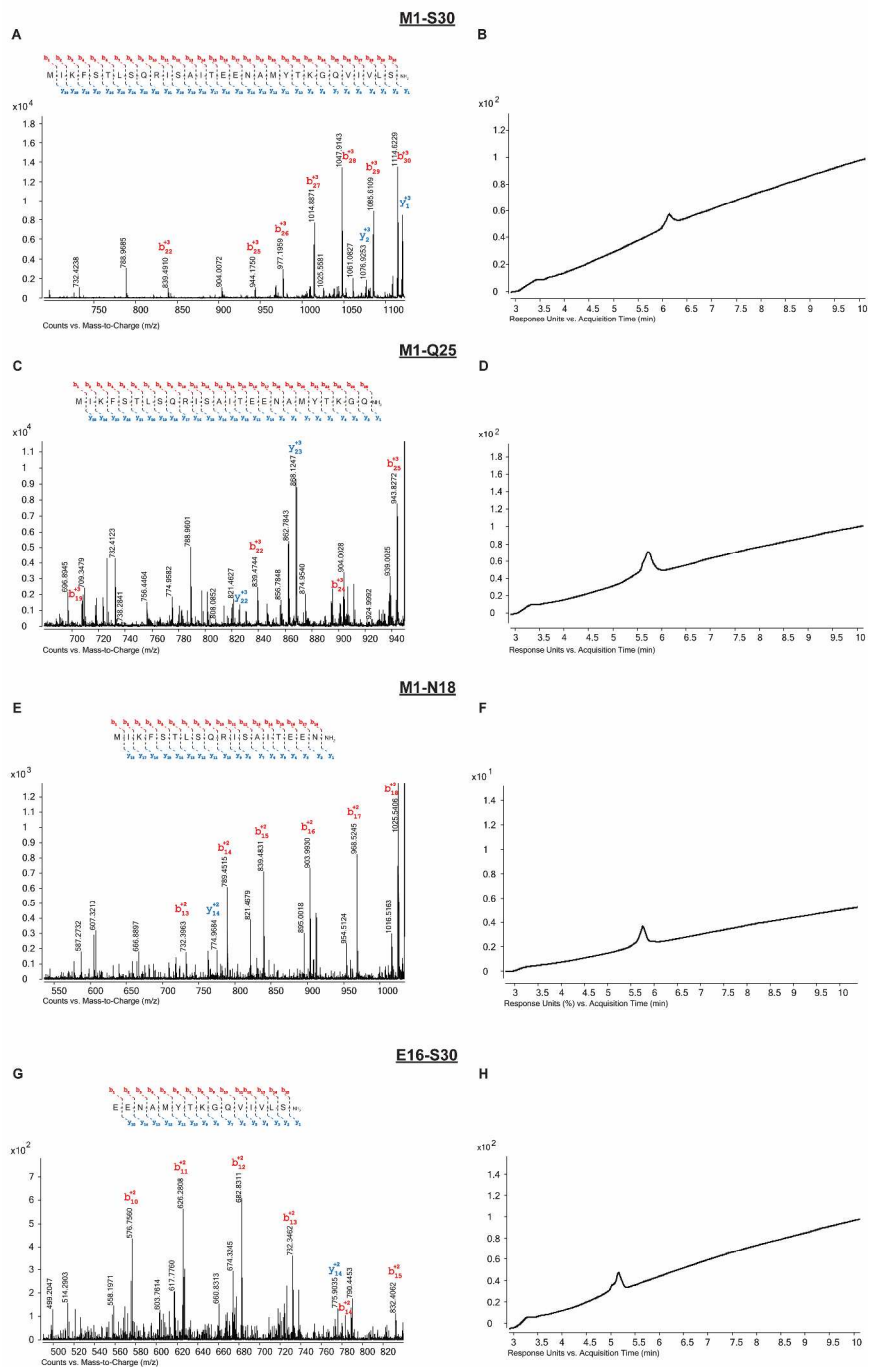

**Fig S10.** LC-MS/MS analysis of the synthesized peptides (A, C, E, G), along with the respective UV traces ( $\lambda = 220$  nm) (B, D, F, G). Details of MS/MS: M1-S30,  $[M + 3H^+]^{+3} = 1119.9340$ , CID = 35.0 eV; M1-Q25,  $[M + 3H^+]^{+3} = 949.4901$ , CID = 40.0 eV; M1-N18,  $[M + 2H^+]^{+2} = 1034.0529$ , CID = 35 eV; E16-S30,  $[M + 2H^+]^{+2} = 840.9355$ , CID = 30.0 eV.

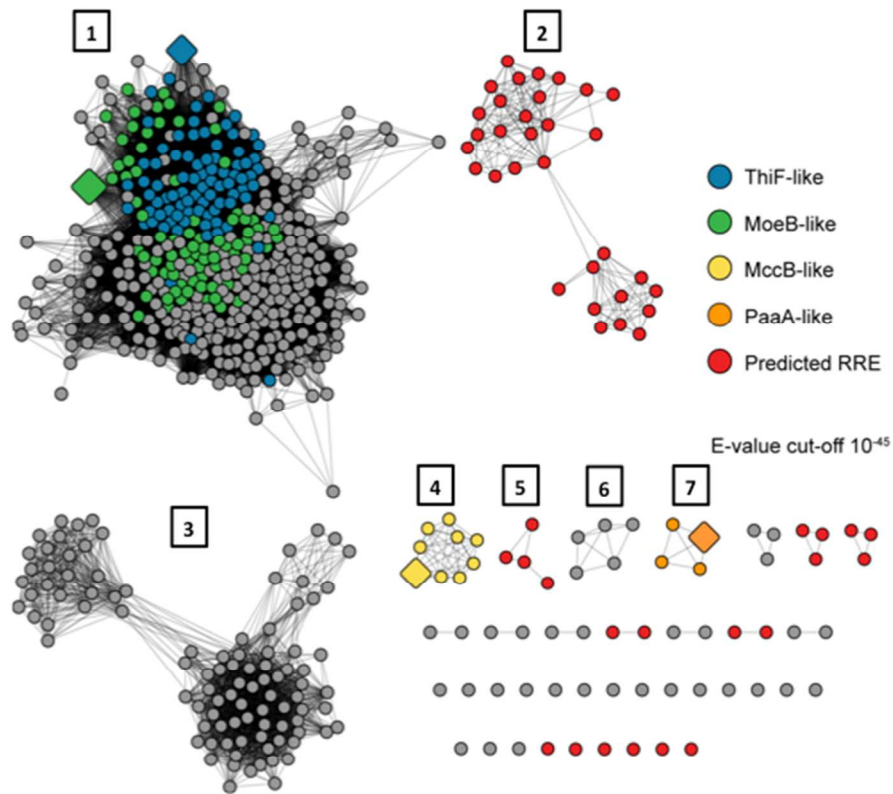

**Figure S11. Sequence similarity network of enzyme sequences closely related to PaaA (practically identical to [Figure 4C](#) in the main manuscript).** The sequence clusters have been given arbitrary numbers for identification. A list of enzyme sequences (Uniprot IDs) that were identified to possess a N-terminal RRE-domain fused to a C-terminal E1-domain is provided in **Table S4**. A histogram of number of enzyme sequences versus sequence length showing the bimodal distribution of sequence length among the above enzymes is provided in **Figure S12**.

**Table S4.** List of identifiers of enzyme sequences that are predicted, from this study, to possess an N-terminal RRE domain fused to an E1-domain, similar to those found in MccB and PaaA.

**Cluster #2**

| Uniprot ID of the displayed representative node | Uniprot IDs of all redundant sequences (sequence identity $\geq$ 60%)                                                                                                                                              | Organism                                                                                                                                                                                                                                                                                                                                                                                                                                                                                                                                                                  |
|-------------------------------------------------|--------------------------------------------------------------------------------------------------------------------------------------------------------------------------------------------------------------------|---------------------------------------------------------------------------------------------------------------------------------------------------------------------------------------------------------------------------------------------------------------------------------------------------------------------------------------------------------------------------------------------------------------------------------------------------------------------------------------------------------------------------------------------------------------------------|
| W7J032                                          | W7J032_9PSEU                                                                                                                                                                                                       | <i>Actinokineospora spheciospongiae</i> .                                                                                                                                                                                                                                                                                                                                                                                                                                                                                                                                 |
| A0A093AL49                                      | A0A093AL49_9PSE                                                                                                                                                                                                    | <i>Amycolatopsis lurida</i> NRRL 2430.                                                                                                                                                                                                                                                                                                                                                                                                                                                                                                                                    |
| A0A093ARQ3                                      | A0A093ARQ3_9PSE                                                                                                                                                                                                    | <i>Amycolatopsis lurida</i> NRRL 2430.                                                                                                                                                                                                                                                                                                                                                                                                                                                                                                                                    |
| A0A066U4V6                                      | A0A066U4V6_9PSE                                                                                                                                                                                                    | <i>Amycolatopsis rifamycinica</i> .                                                                                                                                                                                                                                                                                                                                                                                                                                                                                                                                       |
| C3DUH3                                          | J8FGE9_BACCE<br>C3DUH3_BACTS<br>J3X0F0_BACTU<br>A0A0B5R0H0_BACT<br>A0A0D0H915_BACT<br>B7IJ69_BACC2<br>C3IWZ0_BACTU<br>J7W1T1_BACCE<br>Q3EYC7_BACTI<br>R8C5U0_BACCE<br>R8IEP8_BACCE<br>R8SIK1_BACCE<br>R8YEI9_BACCE | <i>Bacillus cereus</i> MSX-A1.<br><i>Bacillus thuringiensis</i> serovar sotto str. T04001.<br><i>Bacillus thuringiensis</i> HD-771.<br><i>Bacillus thuringiensis</i> HD1002.<br><i>Bacillus thuringiensis</i> subsp. morrisoni.<br><i>Bacillus cereus</i> (strain G9842)<br><i>Bacillus thuringiensis</i> IBL 4222.<br><i>Bacillus cereus</i> VD022.<br><i>Bacillus thuringiensis</i> serovar israelensis<br>ATCC 35646.<br><i>Bacillus cereus</i> str. Schrouff.<br><i>Bacillus cereus</i> K-5975c.<br><i>Bacillus cereus</i> HuB4-4.<br><i>Bacillus cereus</i> TIAC219. |
| A7GP75                                          | A7GP75_BACCN                                                                                                                                                                                                       | <i>Bacillus cereus</i> subsp. cytotoxis (strain NVH 391-98)                                                                                                                                                                                                                                                                                                                                                                                                                                                                                                               |
| A0A0E1MCL2                                      | A0A0E1MCL2_BACC<br>Q4MHV5_BACCE                                                                                                                                                                                    | <i>Bacillus cereus</i> .<br><i>Bacillus cereus</i> G9241.                                                                                                                                                                                                                                                                                                                                                                                                                                                                                                                 |

|            |                                                    |                                                                                                                               |
|------------|----------------------------------------------------|-------------------------------------------------------------------------------------------------------------------------------|
| A0A084GSD0 | A0A084GSD0_9BAC<br>A0A084H489_9BAC                 | <i>Bacillus indicus</i> LMG 22858.<br><i>Bacillus cibi</i> .                                                                  |
| I8UH01     | I8UH01_9BACI                                       | <i>Bacillus macauensis</i> ZFHKF-1.                                                                                           |
| A6CTC6     | A6CTC6_9BACI                                       | <i>Bacillus</i> sp. SG-1.                                                                                                     |
| A0A084HAW3 | A0A084HAW3_9BAC                                    | <i>Bacillus</i> sp. SJS.                                                                                                      |
| H0UFH8     | H0UFH8_BRELA<br>A0A075QWJ5_BREL<br>A0A0F7EFJ7_BREL | <i>Brevibacillus laterosporus</i> GI-9.<br><i>Brevibacillus laterosporus</i> LMG 15441.<br><i>Brevibacillus laterosporus</i>  |
| J2H7P5     | J2H7P5_9BACL<br>C0Z4C4_BREBN                       | <i>Brevibacillus</i> sp. BC25.<br><i>Brevibacillus brevis</i> (strain 47 / JCM 6285 / NBRC 100599)                            |
| F3JLL6     | A0A060PD12_9BUR<br>F3JLL6_PSESX<br>W6VQI7_9PSED    | <i>Burkholderia</i> sp. RPE67.<br><i>Pseudomonas syringae</i> pv. <i>aceris</i> str. M302273.<br><i>Pseudomonas</i> sp. GM30. |
| A0A010ZV91 | A0A010ZV91_9ACT                                    | <i>Cryptosporangium arvum</i> DSM 44712.                                                                                      |
| D3HLN5     | D3HLN5_LEGLN<br>D5T7R6_LEGP2                       | <i>Legionella longbeachae</i> serogroup 1 (strain NSW150)<br><i>Legionella pneumophila</i> serogroup 1 (strain 2300/99 Alcoy) |
| C2KHC2     | C2KHC2_LEUMC                                       | <i>Leuconostoc mesenteroides</i> subsp. <i>cremoris</i> ATCC 19254.                                                           |
| W2ESC3     | W2ESC3_9ACTN                                       | <i>Microbispora</i> sp. ATCC PTA-5024.                                                                                        |
| W7W6X4     | W7W6X4_9ACTN                                       | <i>Micromonospora</i> sp. M42.                                                                                                |
| A0A0A2VAT0 | A0A0A2VAT0_9BAC                                    | <i>Pontibacillus chungwhensis</i> BH030062.                                                                                   |
| D2NQP8     | D2NQP8_ROTMD<br>G5EPD7_9MICC                       | <i>Rothia mucilaginosa</i> (strain DY-18)<br><i>Rothia mucilaginosa</i> M508.                                                 |

|            |                                                                    |                                                                                                                                                                                                     |
|------------|--------------------------------------------------------------------|-----------------------------------------------------------------------------------------------------------------------------------------------------------------------------------------------------|
| KOJU89     | KOJU89_SACES<br>R1G7G7_9PSEU                                       | <i>Saccharothrix espanaensis</i> (strain ATCC 51144 / DSM 44229 / JCM 9112 /NBRC 15066 / NRRL 15764)<br><i>Amycolatopsis vancoresmycina</i> DSM 44592.                                              |
| K8YM84     | K8YM84_STRIT                                                       | <i>Streptococcus intermedius</i> BA1.                                                                                                                                                               |
| D3H7P5     | D3H7P5_STRM6<br>G0IBY4_STRES                                       | <i>Streptococcus mitis</i> (strain B6)<br><i>Streptococcus pseudopneumoniae</i> (strain IS7493)                                                                                                     |
| I0SMH4     | I0SMH4_STRMT                                                       | <i>Streptococcus mitis</i> SK616.                                                                                                                                                                   |
| V8IJD7     | V8IJD7_9STRE<br>A0A064C2F9_STRE<br>A0A0E2PP63_9STR<br>G0IC56_STRES | <i>Streptococcus pseudopneumoniae</i> 5247.<br><i>Streptococcus pneumoniae</i> .<br><i>Streptococcus pseudopneumoniae</i> 22725.<br><i>Streptococcus pseudopneumoniae</i> (strain IS7493)           |
| V6KJT2     | H1Q667_9ACTN<br>V6KJT2_STRRC<br>A0A0F5AFI8_9ACT<br>K4R3M9_9ACTN    | <i>Streptomyces coelicoflavus</i> ZG0656.<br><i>Streptomyces roseochromogenus</i> subsp. <i>oscitans</i> DS 12.976.<br><i>Streptomyces</i> sp. MUSC164.<br><i>Streptomyces davawensis</i> JCM 4913. |
| S5UN22     | S5UN22_STRCU<br>S5V1N6_STRCU<br>B5HV74_9ACTN<br>H1QHZ1_9ACTN       | <i>Streptomyces collinus</i> Tu 365.<br><i>Streptomyces sviceps</i> ATCC 29083.<br><i>Streptomyces coelicoflavus</i> ZG0656.                                                                        |
| A0A0F7N6W8 | A0A0F7N6W8_9ACT                                                    | <i>Streptomyces</i> sp. CNQ-509.                                                                                                                                                                    |
| A0A0F4J813 | A0A0F4J813_9ACT                                                    | <i>Streptomyces</i> sp. NRRL S-495.                                                                                                                                                                 |
| A0A077NK48 | A0A077N775_XENB<br>A0A077NK48_XENB                                 | <i>Xenorhabdus bovienii</i> str. <i>feltiae</i> Florida.<br><i>Xenorhabdus bovienii</i> str. <i>puntauvense</i> .                                                                                   |
| K1ZWN5     | K1ZWN5_9BACT                                                       | uncultured bacterium.                                                                                                                                                                               |



**Cluster #4: MccB-like**

| <b>Uniprot ID of the displayed representative node</b> | <b>Uniprot IDs of all redundant sequences (sequence identity <math>\geq</math> 60%)</b> | <b>Organism</b>                                                                                           |
|--------------------------------------------------------|-----------------------------------------------------------------------------------------|-----------------------------------------------------------------------------------------------------------|
| A0A0B2T253                                             | A0A0B2T253_9ENT                                                                         | <i>Dickeya solani</i> .                                                                                   |
| I2WYG2                                                 | Q47506_ECOLX<br>I2WYG2_ECOLX<br>Q2KKH8_ECOLX<br>H9AXU7_ECOLX<br>Q83Y58_ECOLX            | <i>Escherichia coli</i> .<br><i>Escherichia coli</i> 4.0967.                                              |
| A0A097H3S3                                             | A0A097H3S3_MORC                                                                         | <i>Moraxella catarrhalis</i> .                                                                            |
| A0A094SZ85                                             | A0A094SZ85_PECC                                                                         | <i>Pectobacterium carotovorum</i> subsp. odoriferum.                                                      |
| Q7N6N1                                                 | Q7N6N1_PHOLL                                                                            | <i>Photorhabdus luminescens</i> subsp. laumondii (strain TT01)                                            |
| A0A081RU21                                             | A0A081RU21_PHOT<br>W3VAQ7_PHOTE                                                         | <i>Photorhabdus temperata</i> subsp. temperata Meg1.<br><i>Photorhabdus temperata</i> subsp. khanii NC19. |
| A0A068Z1N7                                             | A0A068Z1N7_9ENT                                                                         | <i>Serratia symbiotica</i> .                                                                              |
| D7HFZ3                                                 | D7HFZ3_VIBCL                                                                            | <i>Vibrio cholerae</i> RC385.                                                                             |
| A0A068QXZ7                                             | A0A068QXZ7_9ENT                                                                         | <i>Xenorhabdus doucetiae</i> .                                                                            |

### Cluster #5

| <b>Uniprot ID of the displayed representative node</b> | <b>Uniprot IDs of all redundant sequences (sequence identity <math>\geq</math> 60%)</b> | <b>Organism</b>                                                              |
|--------------------------------------------------------|-----------------------------------------------------------------------------------------|------------------------------------------------------------------------------|
| A0JT12                                                 | A0JT12_ARTS2                                                                            | <i>Arthrobacter sp.</i> (strain FB24)                                        |
| Q3AGP4                                                 | Q3AGP4_SYNSC                                                                            | <i>Synechococcus sp.</i> (strain CC9605)                                     |
| Q05XM9                                                 | Q05XM9_9SYNE                                                                            | <i>Synechococcus sp.</i> RS9916.                                             |
| I4B9Q3                                                 | I4B9Q3_TURPD                                                                            | <i>Turneriella parva</i> (strain ATCC BAA-1111 / DSM 21527 / NCTC 11395 / H) |

### Cluster #7: PaaA-like

| <b>Uniprot ID of the displayed representative node</b> | <b>Uniprot IDs of all redundant sequences (sequence identity <math>\geq</math> 60%)</b>               | <b>Organism</b>                                                                                                                                                                                                                 |
|--------------------------------------------------------|-------------------------------------------------------------------------------------------------------|---------------------------------------------------------------------------------------------------------------------------------------------------------------------------------------------------------------------------------|
| A0A066TVR9                                             | A0A066TVR9_9PSE                                                                                       | <i>Amycolatopsis rifamycinica</i> .                                                                                                                                                                                             |
| A0A089YR18                                             | A0A059IDB8_ENTA<br>Q9ZAR3_ENTAG<br>A0A0A3Z577_9ENT<br>E1SC02_PANVC<br>C6CMV8_DICZE<br>A0A089YR18_9PSE | <i>Pantoea agglomerans</i> Eh318.<br><i>Enterobacter agglomerans</i><br><i>Enterobacter cancerogenus</i> .<br><i>Pantoea vagans</i> (strain C9-1)<br><i>Dickeya zeae</i> (strain Ech1591)<br><i>Pseudomonas rhizosphaerae</i> . |
| B6VML4                                                 | B6VML4_PHOAA<br>K8W971_9ENTR<br>A0A0A2R5Y1_MORM<br>W3YH34_9ENTR                                       | <i>Photorhabdus asymbiotica</i> subsp. <i>asymbiotica</i> (strain ATCC 43949 /3105-77)<br><i>Providencia burhodogranariae</i> DSM 19968.<br><i>Morganella morganii</i><br><i>Providencia alcalifaciens</i> PAL-3.               |
| A0A023Y5D6                                             | A0A023Y5D6_9GAM                                                                                       | <i>Stenotrophomonas rhizophila</i> .                                                                                                                                                                                            |

---

A0A072CQGO\_9RHI      *Sinorhizobium americanum* CCGM7.

---

### Triads

---

| <b>Uniprot ID of the displayed representative node</b> | <b>Uniprot IDs of all redundant sequences (sequence identity <math>\geq</math> 60%)</b> | <b>Organism</b>                                                                  |
|--------------------------------------------------------|-----------------------------------------------------------------------------------------|----------------------------------------------------------------------------------|
| A0A0C7GDE2                                             | A0A0C7GDE2_CLOS                                                                         | <i>Clostridium sordellii</i> .                                                   |
| X8H5B6                                                 | R7N0E0_9FIRM<br>X8H5B6_9FUSO                                                            | <i>Megasphaera elsdenii</i> CAG:570.<br><i>Fusobacterium</i> sp. CM22.           |
| A0A0F9JH24                                             | A0A0F9JH24_9ZZZ                                                                         | marine sediment metagenome.                                                      |
| A8MGD8                                                 | A0A0C7GFF0_CLOS<br>A8MGD8_ALKOO                                                         | <i>Clostridium sordellii</i> .<br><i>Alkaliphilus oremlandii</i> (strain OhILAs) |
| X8H5E2                                                 | X8H5E2_9FUSO                                                                            | <i>Fusobacterium</i> sp. CM22.                                                   |
| R7MYS1                                                 | R7MYS1_9FIRM                                                                            | <i>Megasphaera elsdenii</i> CAG:570.                                             |

---

### Doublets

---

| <b>Uniprot ID of the displayed representative node</b> | <b>Uniprot IDs of all redundant sequences (sequence identity <math>\geq</math> 60%)</b> | <b>Organism</b>                                                                                                                                                                                                       |
|--------------------------------------------------------|-----------------------------------------------------------------------------------------|-----------------------------------------------------------------------------------------------------------------------------------------------------------------------------------------------------------------------|
| A0A087VVN7                                             | A0A087VVN7_9BIF<br>A0A0A8NJI7_BIFL<br>B7GUS2_BIFLS                                      | <i>Bifidobacterium indicum</i> LMG 11587 = DSM 20214.<br><i>Bifidobacterium longum</i> subsp. infantis.<br><i>Bifidobacterium longum</i> subsp. infantis (strain ATCC 15697 / DSM 20088/ JCM 1222 / NCTC 11817 / S12) |

---

|        |                                              |                                                                                                                            |
|--------|----------------------------------------------|----------------------------------------------------------------------------------------------------------------------------|
| L2HAB5 | L2HAB5_ENTFC<br>R3KWK3_ENTFC<br>R4EEX5_ENTFC | <i>Enterococcus faecium</i> EnGen0012.<br><i>Enterococcus faecium</i> EnGen0371.<br><i>Enterococcus faecium</i> EnGen0174. |
| H5SWR4 | H5SWR4_LACLL                                 | <i>Lactococcus lactis</i> subsp. <i>lactis</i> IO-1.                                                                       |
| F6DIW7 | F6DIW7_THETG                                 | <i>Thermus thermophilus</i> (strain SG0.5JP17-16)                                                                          |

### Singlets

| Uniprot ID of the displayed representative node | Uniprot IDs of all redundant sequences (sequence identity $\geq$ 60%)              | Organism                                                                                                                                                                                                                                                                                              |
|-------------------------------------------------|------------------------------------------------------------------------------------|-------------------------------------------------------------------------------------------------------------------------------------------------------------------------------------------------------------------------------------------------------------------------------------------------------|
| A7BJB3                                          | A7BJB3_BACNA                                                                       | <i>Bacillus subtilis</i> subsp. <i>natto</i> .                                                                                                                                                                                                                                                        |
| J1A7E5                                          | J1A7E5_BARTA<br>J1IU97_9RHIZ<br>J0Q0K9_9RHIZ                                       | <i>Bartonella taylorii</i> 8TBB.<br><i>Bartonella alsatica</i> IBS 382.<br><i>Bartonella</i> sp. DB5-6.                                                                                                                                                                                               |
| G7M965                                          | G7M965_9CLOT                                                                       | <i>Clostridium</i> sp. DL-VIII.                                                                                                                                                                                                                                                                       |
| A0A0B6EMG0                                      | A0A0B6EMG0_9COR                                                                    | <i>Corynebacterium singulare</i> .                                                                                                                                                                                                                                                                    |
| A0A081S0W5                                      | A0A081S0W5_PHOT<br>A0A0F7LLG9_PHOT<br>T0PAZ7_PHOTE<br>U7R6K5_PHOTE<br>Q7N4X2_PHOLL | <i>Photorhabdus temperata</i> subsp. <i>temperata</i> Meg1.<br><i>Photorhabdus temperata</i> subsp. <i>thracensis</i> .<br><i>Photorhabdus temperata</i> subsp. <i>temperata</i> M1021.<br><i>Photorhabdus temperata</i> J3.<br><i>Photorhabdus luminescens</i> subsp. <i>laumondii</i> (strain TT01) |
| A0A0B3AQI5                                      | A0A0B3AQI5                                                                         | archaeon GW2011_AR19                                                                                                                                                                                                                                                                                  |

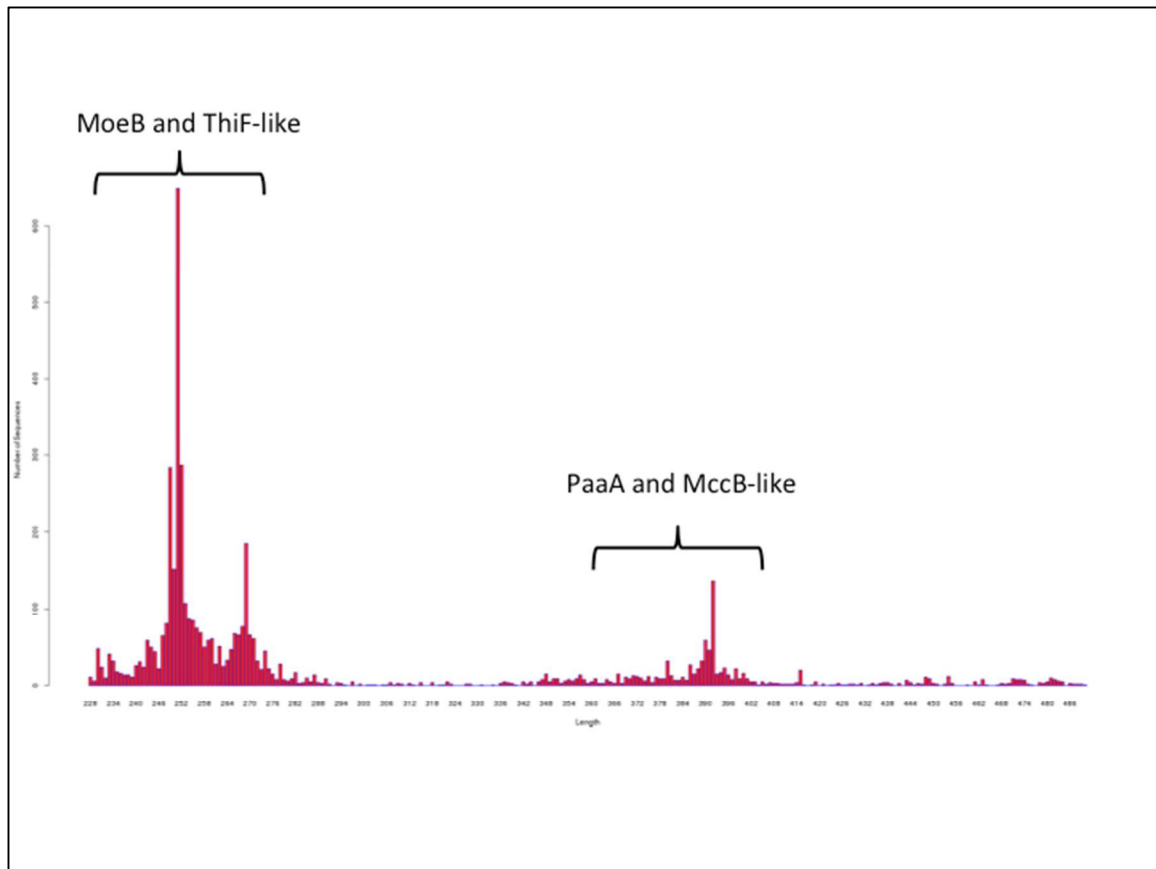

**Fig S12. Bimodal distribution of the lengths of proteins related to PaaA and MccB.** This figure was generated as a part of the output from the EFI-EST online tool, and has been reproduced here with suitable labels.
